# Supplementary material
Source: HighWire-hosted journal article supplement (http://www.qdcxjkg.com/highwire/filestream/114076/field_highwire_adjunct_files/0/ERJ-02002-2012_Disclosures.pdf)
Supplement: ERJ-02002-2012_Disclosures.pdf [file ERJ-02002-2012_Disclosures.pdf]

**E.D. Bateman** has received lecture fees and remuneration from Novartis for serving on an advisory board, and his institution for participation in clinical trials.

**G.T. Ferguson** has received industry funding from Novartis to perform clinical trials, with payments for study activities being in excess of USD 50 000 over the last 5 years. The author has received payment from Novartis for consulting at advisory boards for less than USD 10 000 over the last 5 years.

**N. Barnes** has served on advisory boards or given lectures for Almirall, Chiesi, Boehringer Ingelheim, GlaxoSmithKline, Novartis, Nycomed, NAPP and Teva. The author has received research grants from Almirall, AstraZeneca, GlaxoSmithKline, Takeda, Boehringer Ingelheim and Chiesi.

**N. Gallagher** is an employee of Novartis Pharma AG, and holds stocks and shares with the company.

**Y. Green** is employed by Novartis.

**M. Henley** is employed by Novartis.

**D. Banerji** is an employee of Novartis.
